# Supplementary material for: Single-cell RNA sequencing highlights the role of inflammatory cancer-associated fibroblasts in bladder urothelial carcinoma
Source: PubMed Central journal article supplement (PMC7545162; doi:10.1038/s41467-020-18916-5), 2020-10-08
Supplement: 41467_2020_18916_MOESM1_ESM.pdf [file 41467_2020_18916_MOESM1_ESM.pdf]

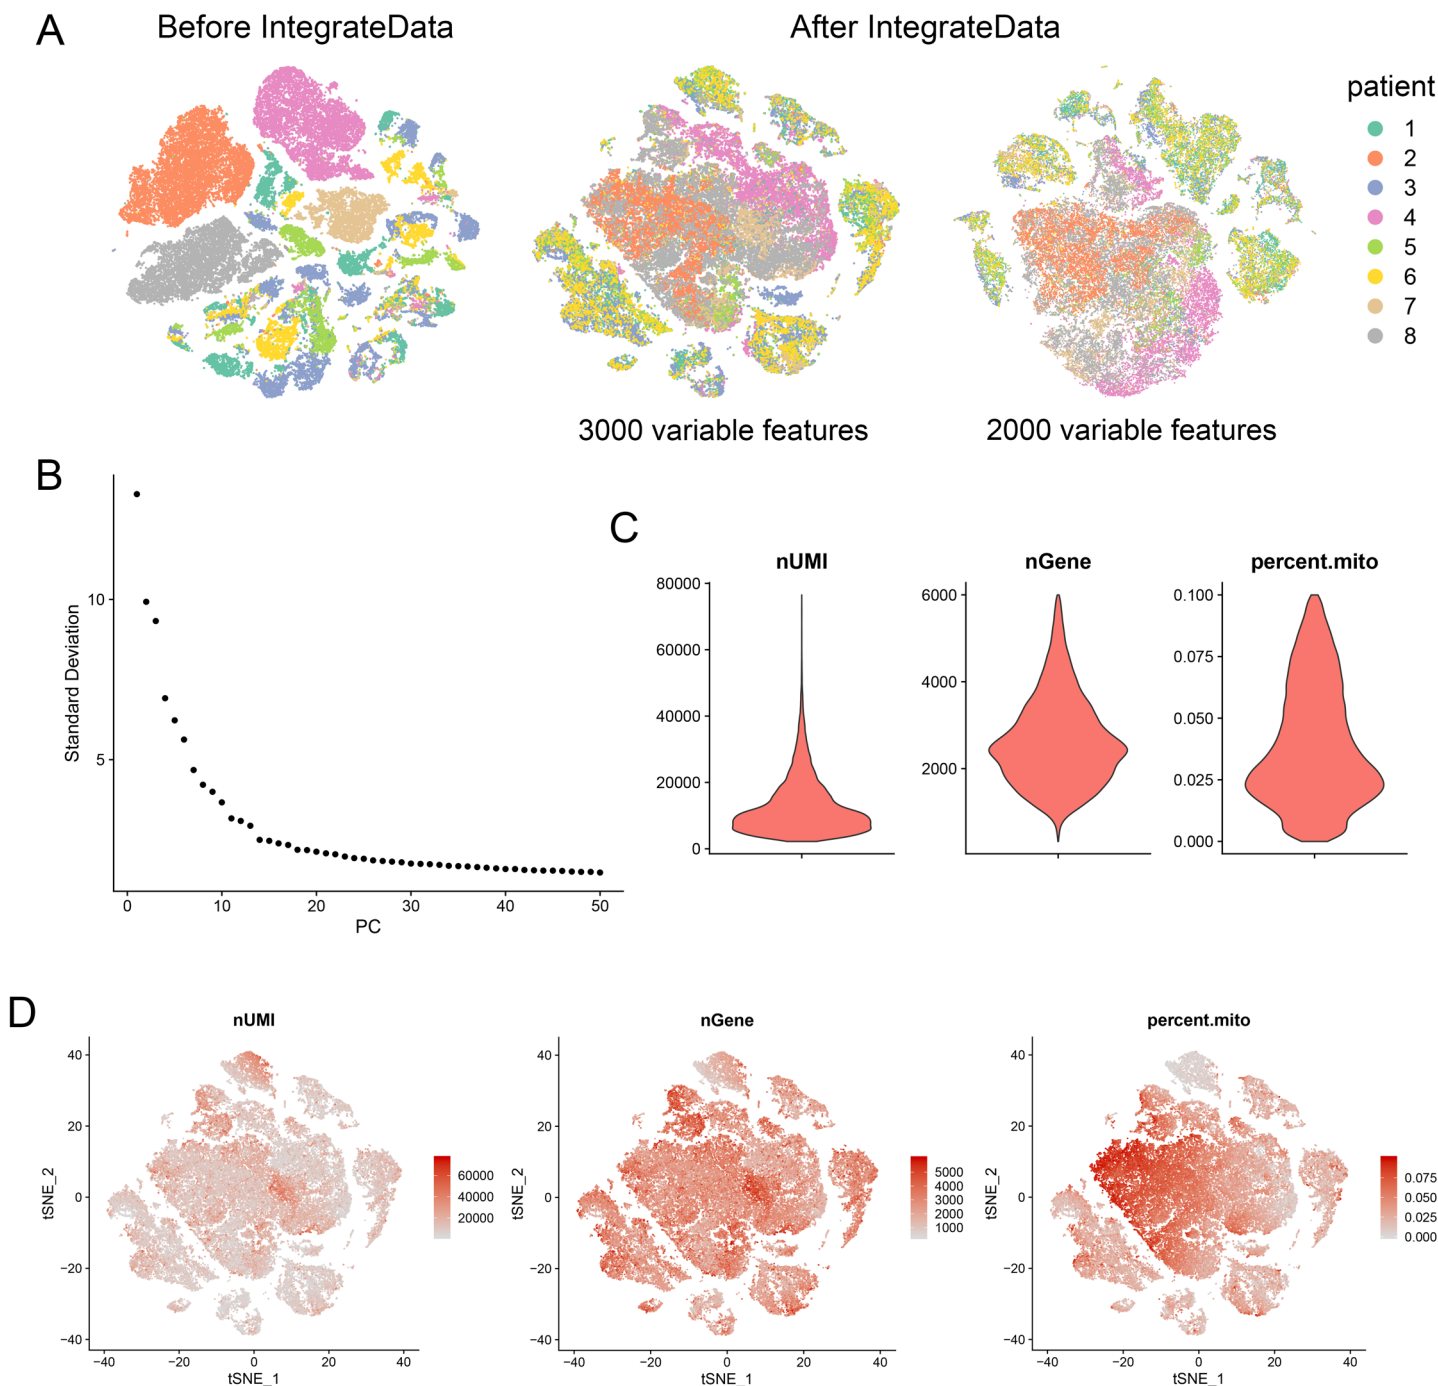

**Supplementary Figure 1: Quality control of single cell sequencing data. 1A:** Removing batch effect between batches. 3000 variable features (middle) and 2000 variable features (right) were used respectively. **1B:** Scree plot show top50 PCs of principle component analysis. Top30 PCs were used in downstream analysis. **1C:** Vlnplot show number of UMI (nUMI), number of genes (nGene) detected and percent of mitochondrial derived transcripts (percent.mito) per single cell after quality control. **1D:** tSNE plot of single cells profiled here colored by nUMI, nGene detected, and percent.mito.

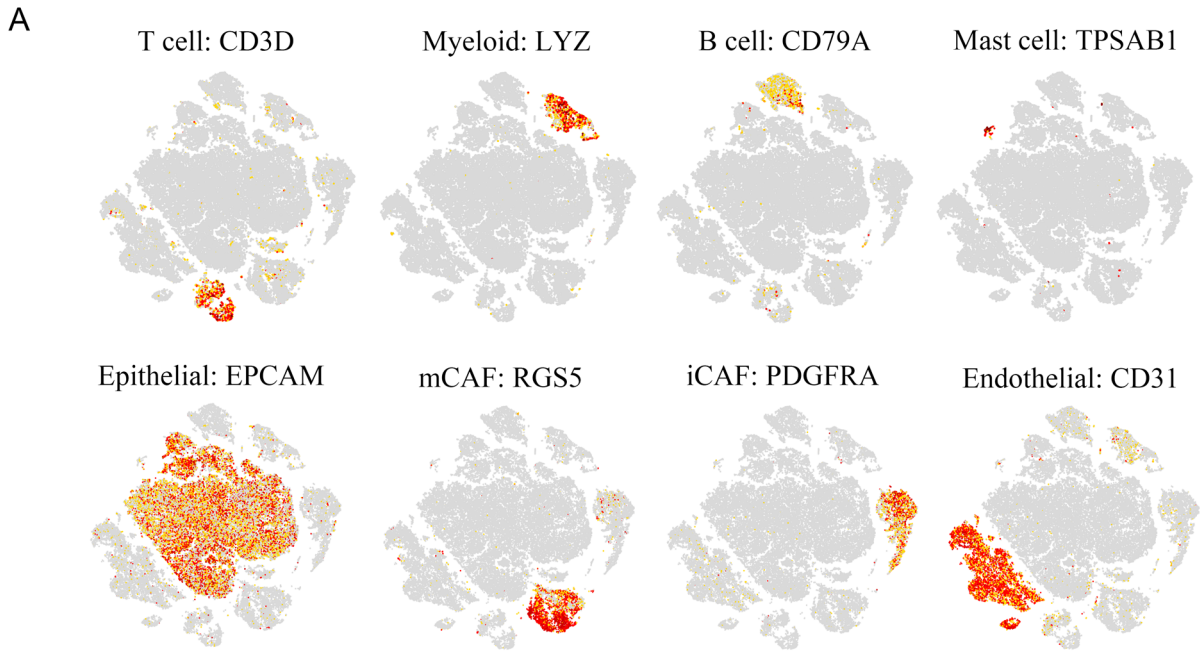

**B**

| Sample       | Number of cells | Grade |
|--------------|-----------------|-------|
| 1-Normal     | 3356            | -     |
| 3-Normal     | 5134            | -     |
| 6-Normal     | 2761            | -     |
| 1-Tumor      | 3006            | Low   |
| 2-Tumor      | 9320            | Low   |
| 3-Tumor      | 3463            | High  |
| 4-Tumor      | 8226            | High  |
| 5-Tumor      | 4218            | High  |
| 6-Tumor      | 1818            | High  |
| 7-Tumor      | 3854            | High  |
| 8-Tumor      | 7565            | High  |
| <b>Total</b> | <b>52721</b>    |       |

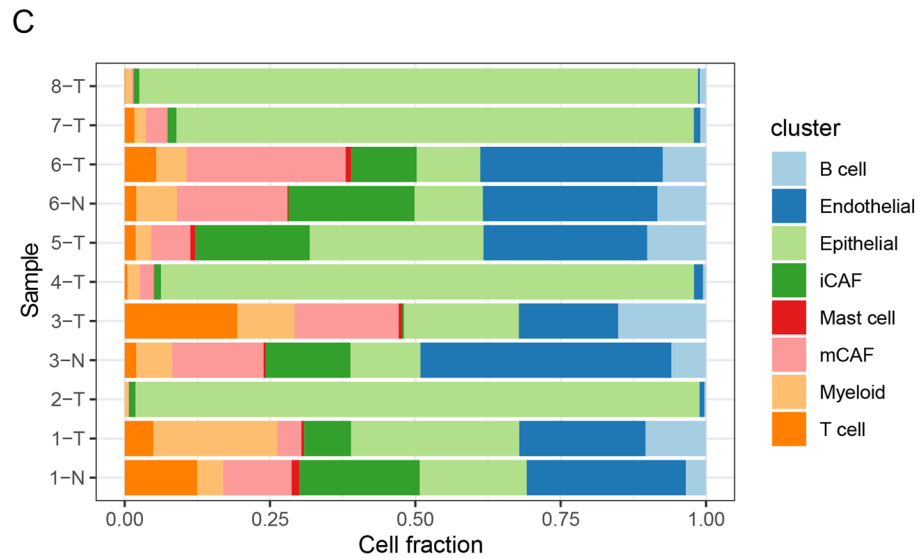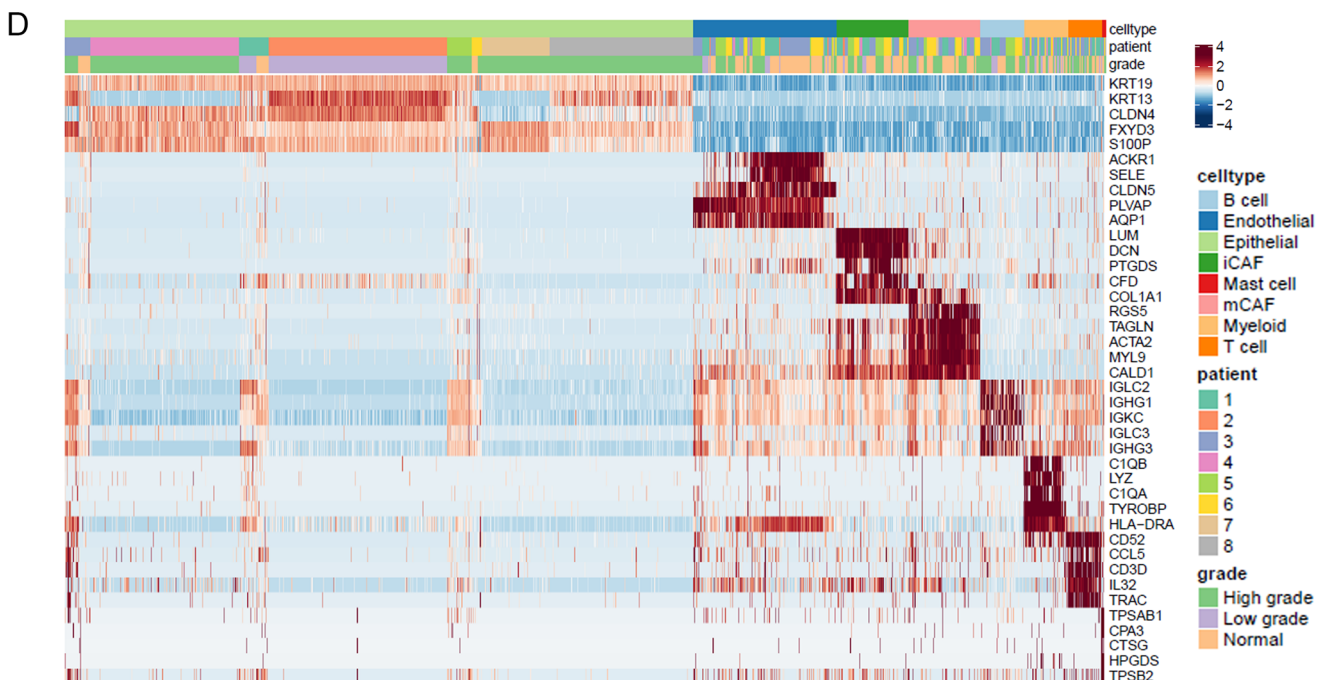

**Supplementary Figure 2: Identification of major cell types in BC TME. 2A:** Expression of marker genes for major cell types. Eight major cell types were identified: epithelial (EPCAM+) cells; endothelial (CD31+) cells; two types of fibroblasts (COL1A1+) – inflammatory cancer-associated fibroblasts (iCAFs) (PDGFRA+) and myo-CAFs (mCAFs) (RGS5+); B cells (CD79A+); myeloid cells (LYZ+); T cells (CD3D+); and mast cells (TPSAB1+). **2B:** Clinical information and number of cells profiled of every sample involved in the presenting work. **2C:** The fraction of major cell types originated from the 3 non-malignant samples and 8 tumor samples. **2D:** Heatmap of top 5 marker genes of every major cell types. Shown are row z-score.

A

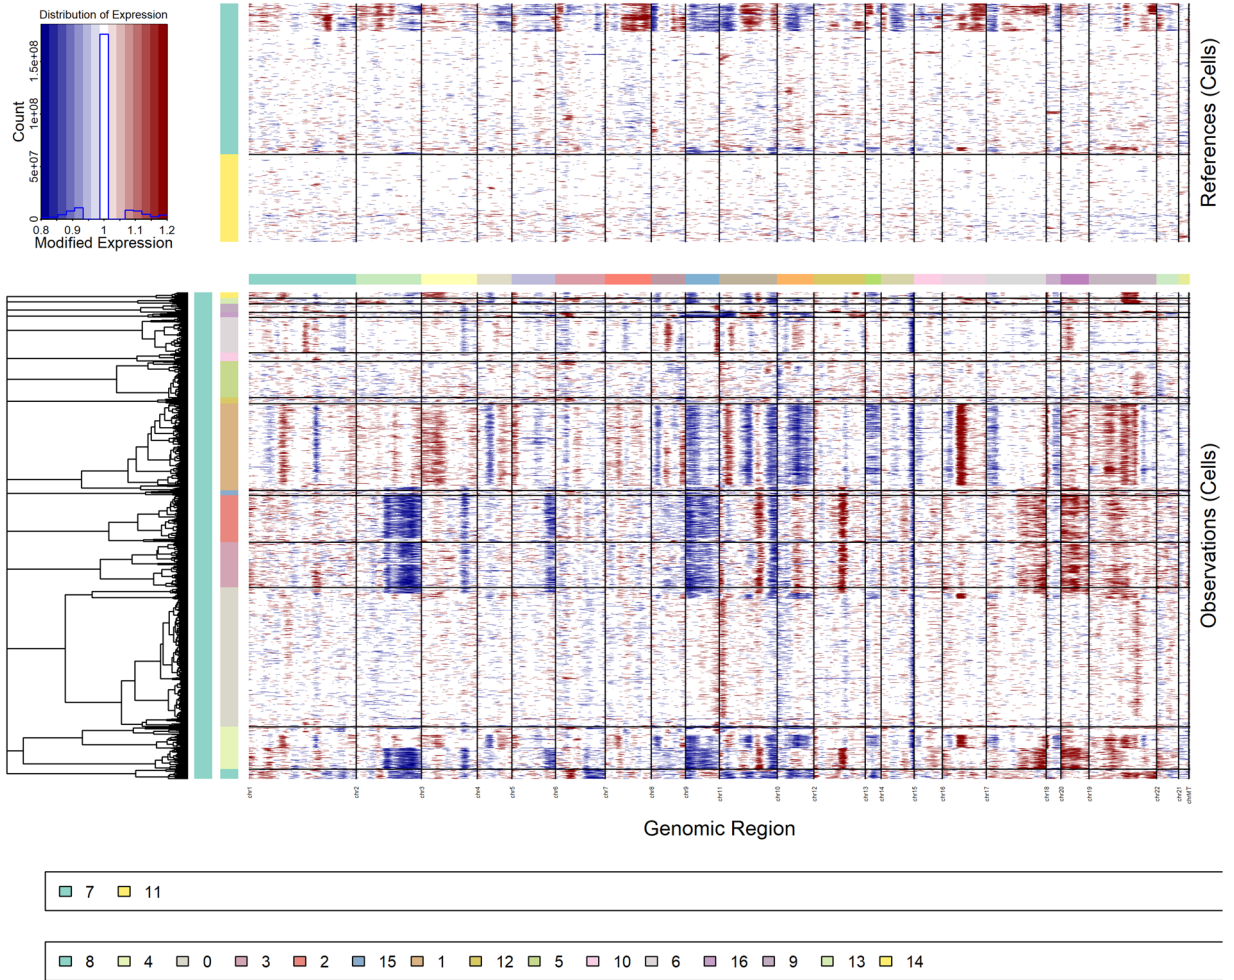

B

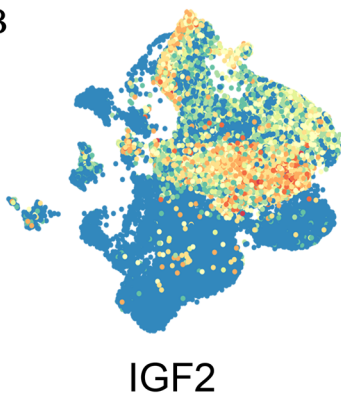

C

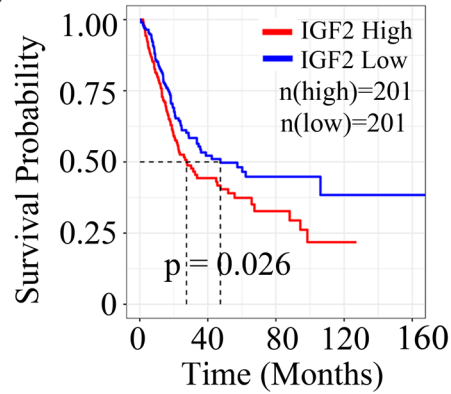

**Supplementary Figure 3A:** Copy number variations (CNVs) evaluated per cell by InferCNV. Two normal-derived epithelial clusters were used as control group. **3B:** Expression of IGF2 for epithelial cells. **3C:** Kaplan-Meier survival curve for IGF2 in TCGA BLCA cohort, expression of IGF2 was corrected by EPCAM expression level with GEPIA2 method. P value: log-rank p value.

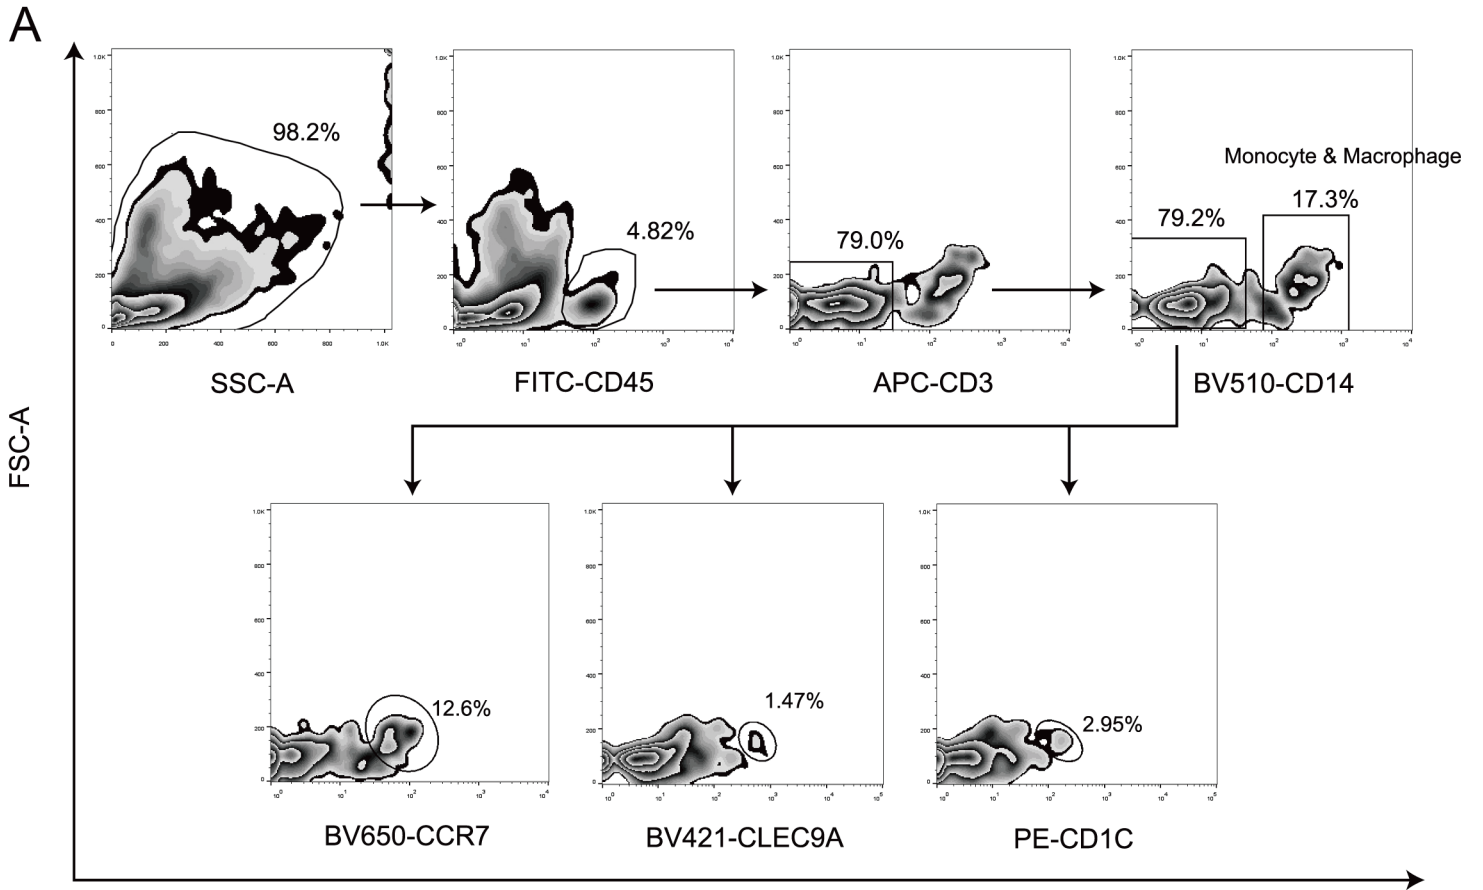

**Supplementary Figure 4A:** Flow cytometry confirmed the Monocyte and DC subgroups in bladder carcinoma microenvironment.

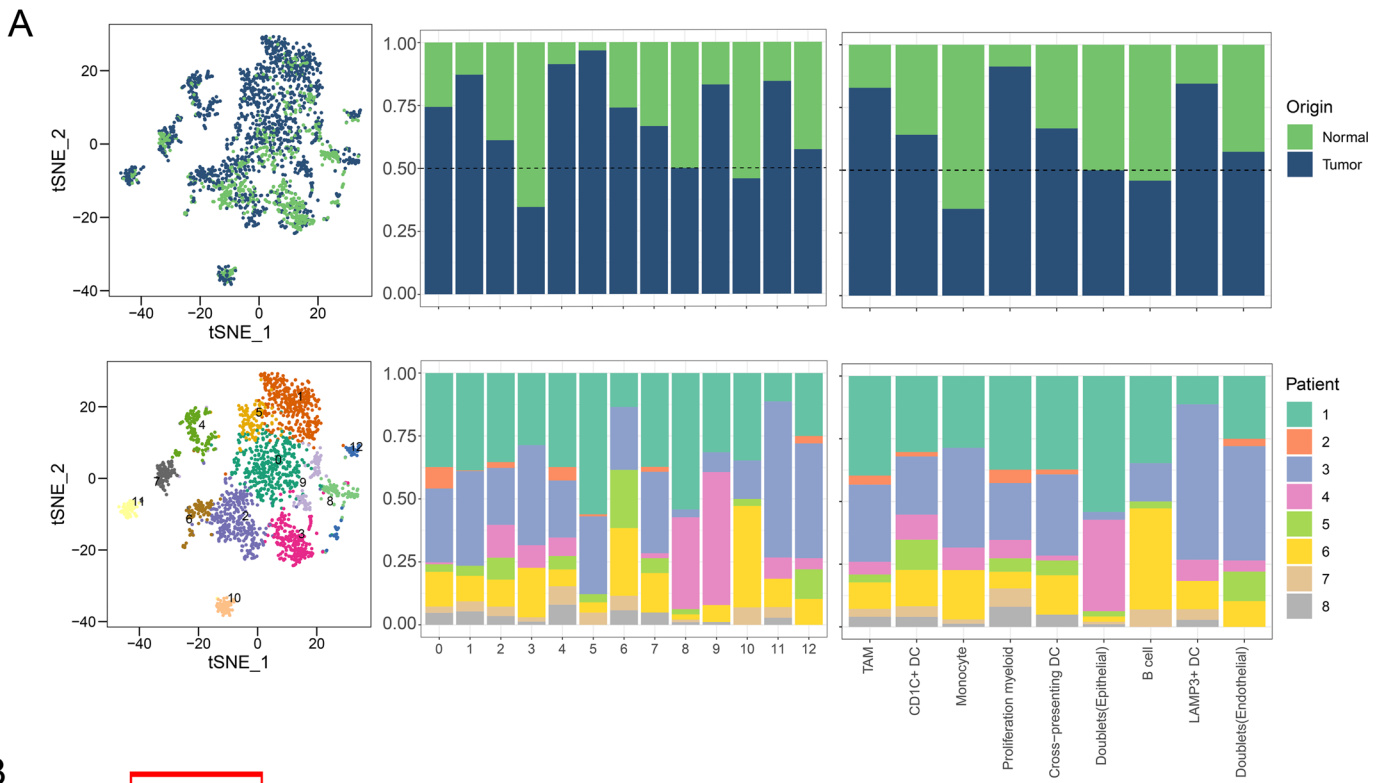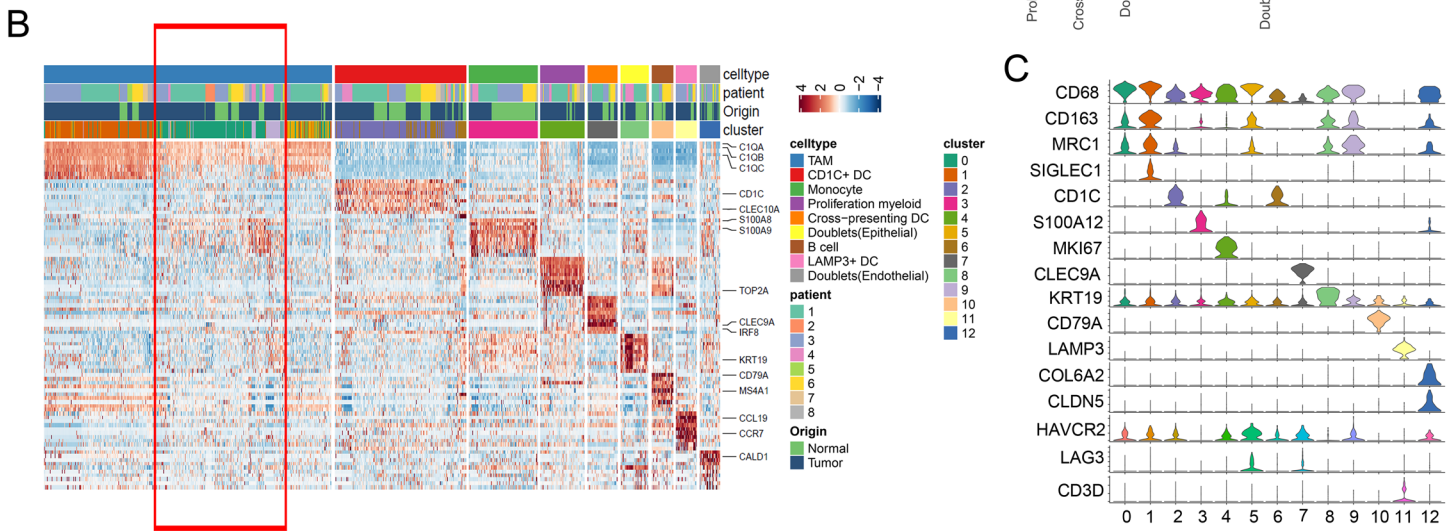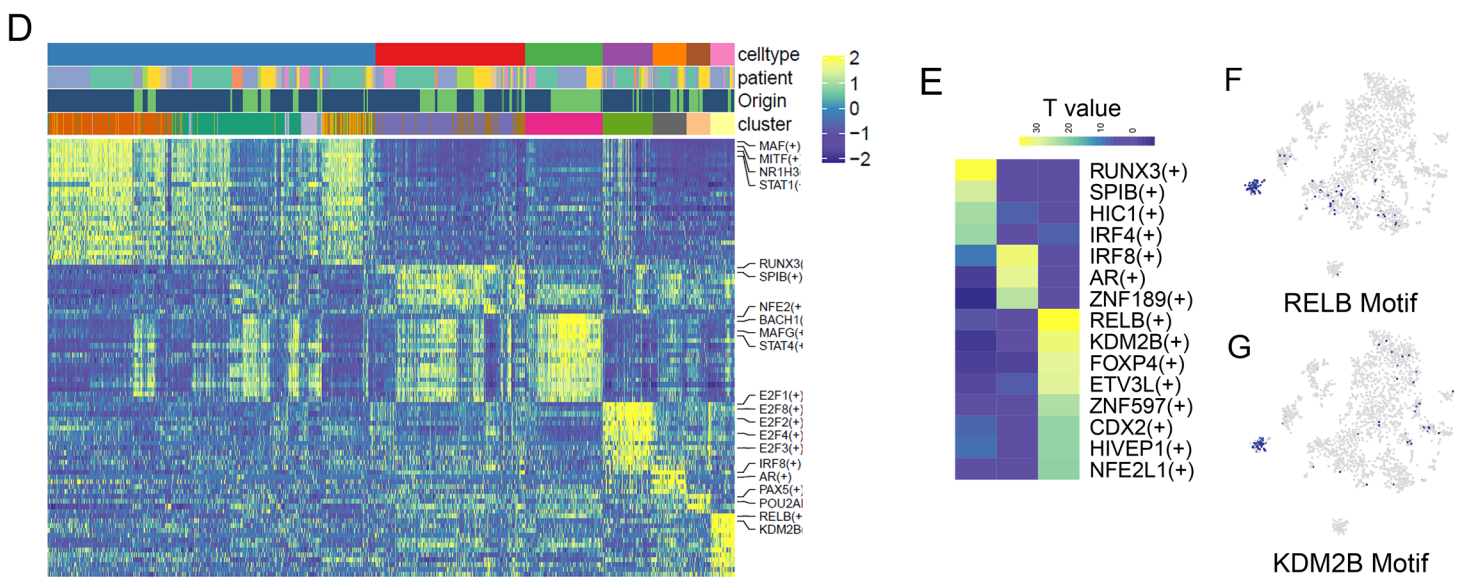

**Supplementary Figure 5A:** tSNE plot of LYZ+ cells colored by origin (left, up) and clusters (left, down). For cell clusters or cell subgroups, fractions of cells originating from tumor or non-malignant tissues and different patients were also offered in the right. **5B:** Heatmap of top 5 marker genes of every cell subgroups. Shown are row z-score. **5C:** Violin plots of selected cell type-specific genes. **5D:** Activation of TF motifs evaluated by SCENIC could also identify cell subgroups. Shown are row z-score. **5E:** Top differentially activated TF motifs between DC subgroups. Shown are t-values from a linear model. **5F-5G:** AUC of top 2 LAMP3+ DC specific TF motifs.

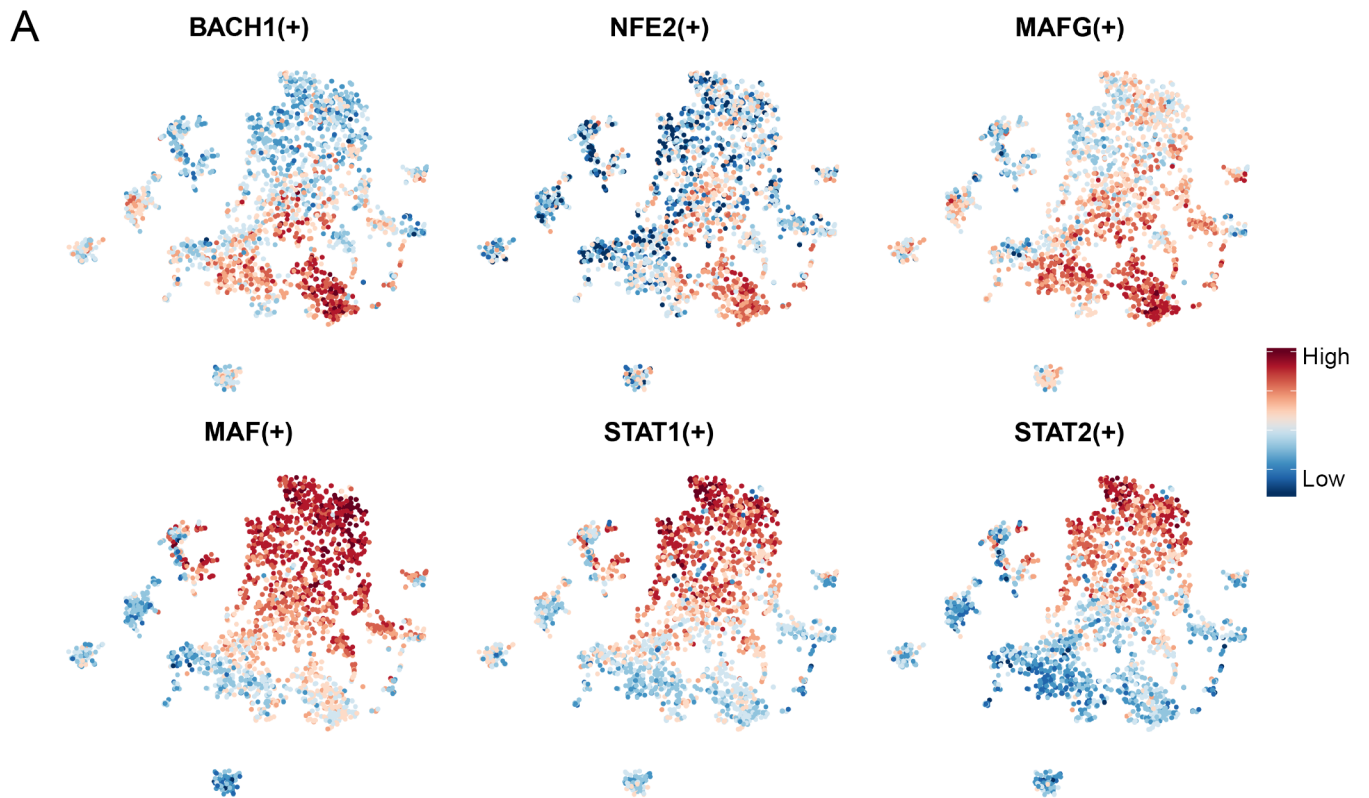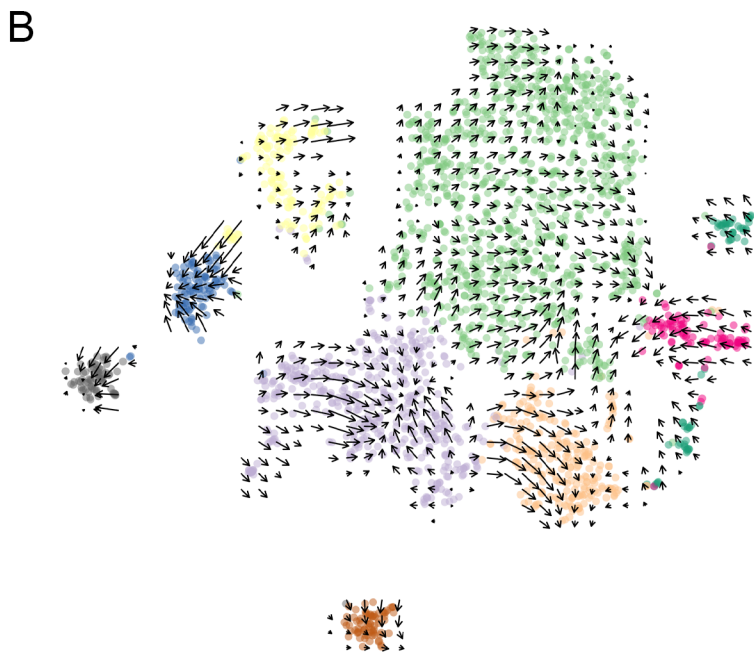

**Supplementary Figure 6A:** AUC of potential regulons take part in polarization of monocyte. **6B:** RNA velocity analysis of Myeloid lineage.



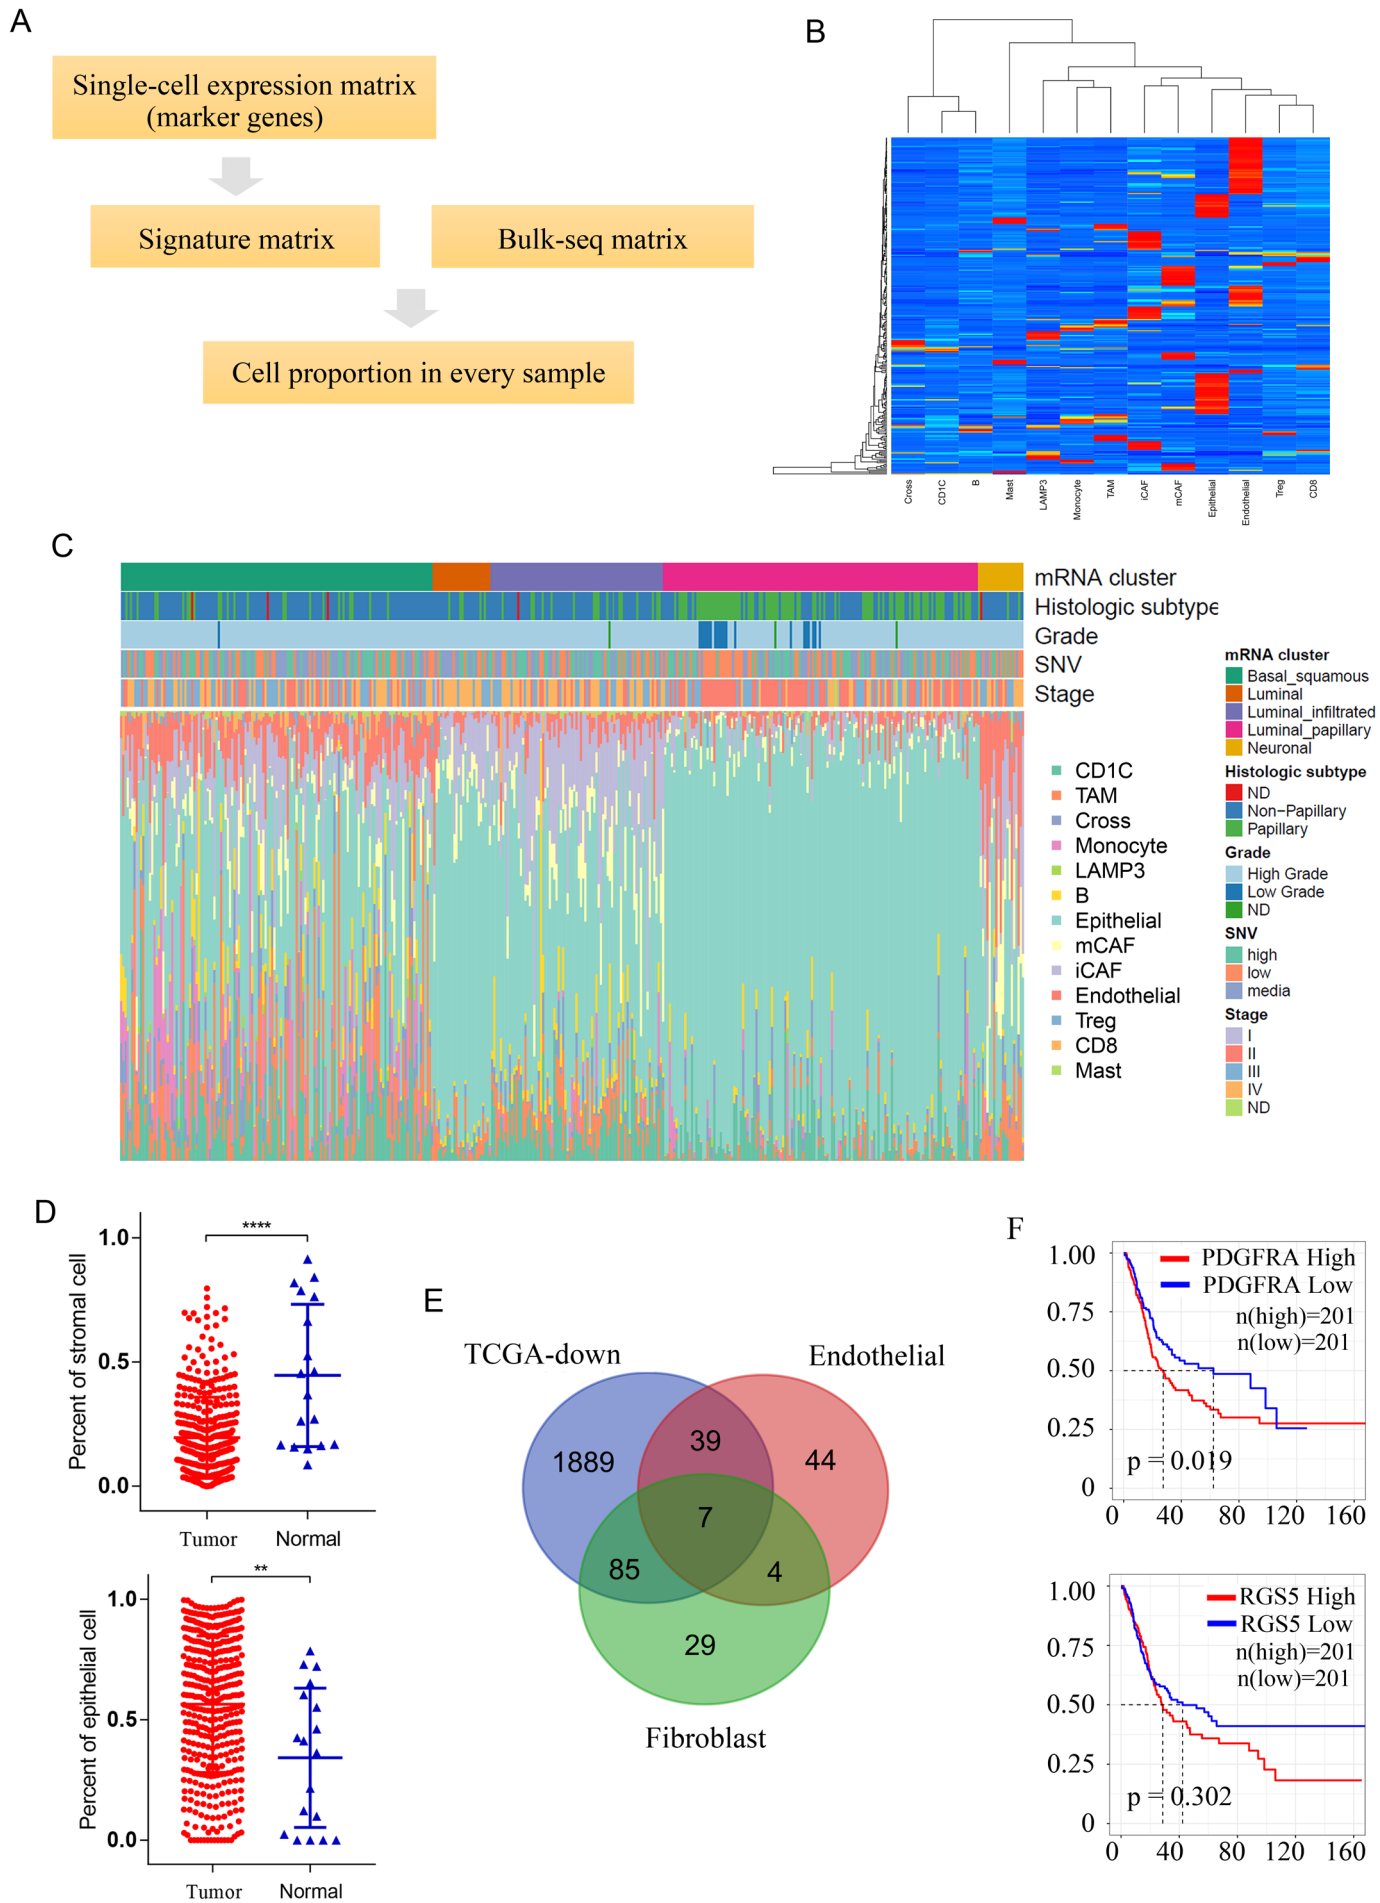

**Supplementary Figure 7A:** Workflow of the estimation of relative cell abundance with CIBERSORTx. **7B:** Signature matrix created by CIBERSORTx. **7C:** Fraction of tumor infiltrated cells was associated with molecular subtypes. **7D:** Tumor sample contains less stromal cells and more epithelial cells in TCGA BLCA cohort. Two side student's t-test was conducted. \*\*:  $p < 0.01$ , \*\*\*\*:  $p < 0.0001$ . **7E:** Venn plot shown overlapped DEGs between TCGA down-regulated genes, endothelial markers and Fibroblast markers. **7F:** Kaplan-Meier survival curve of iCAFs and mCAFs specific genes. P: log-rank p value.

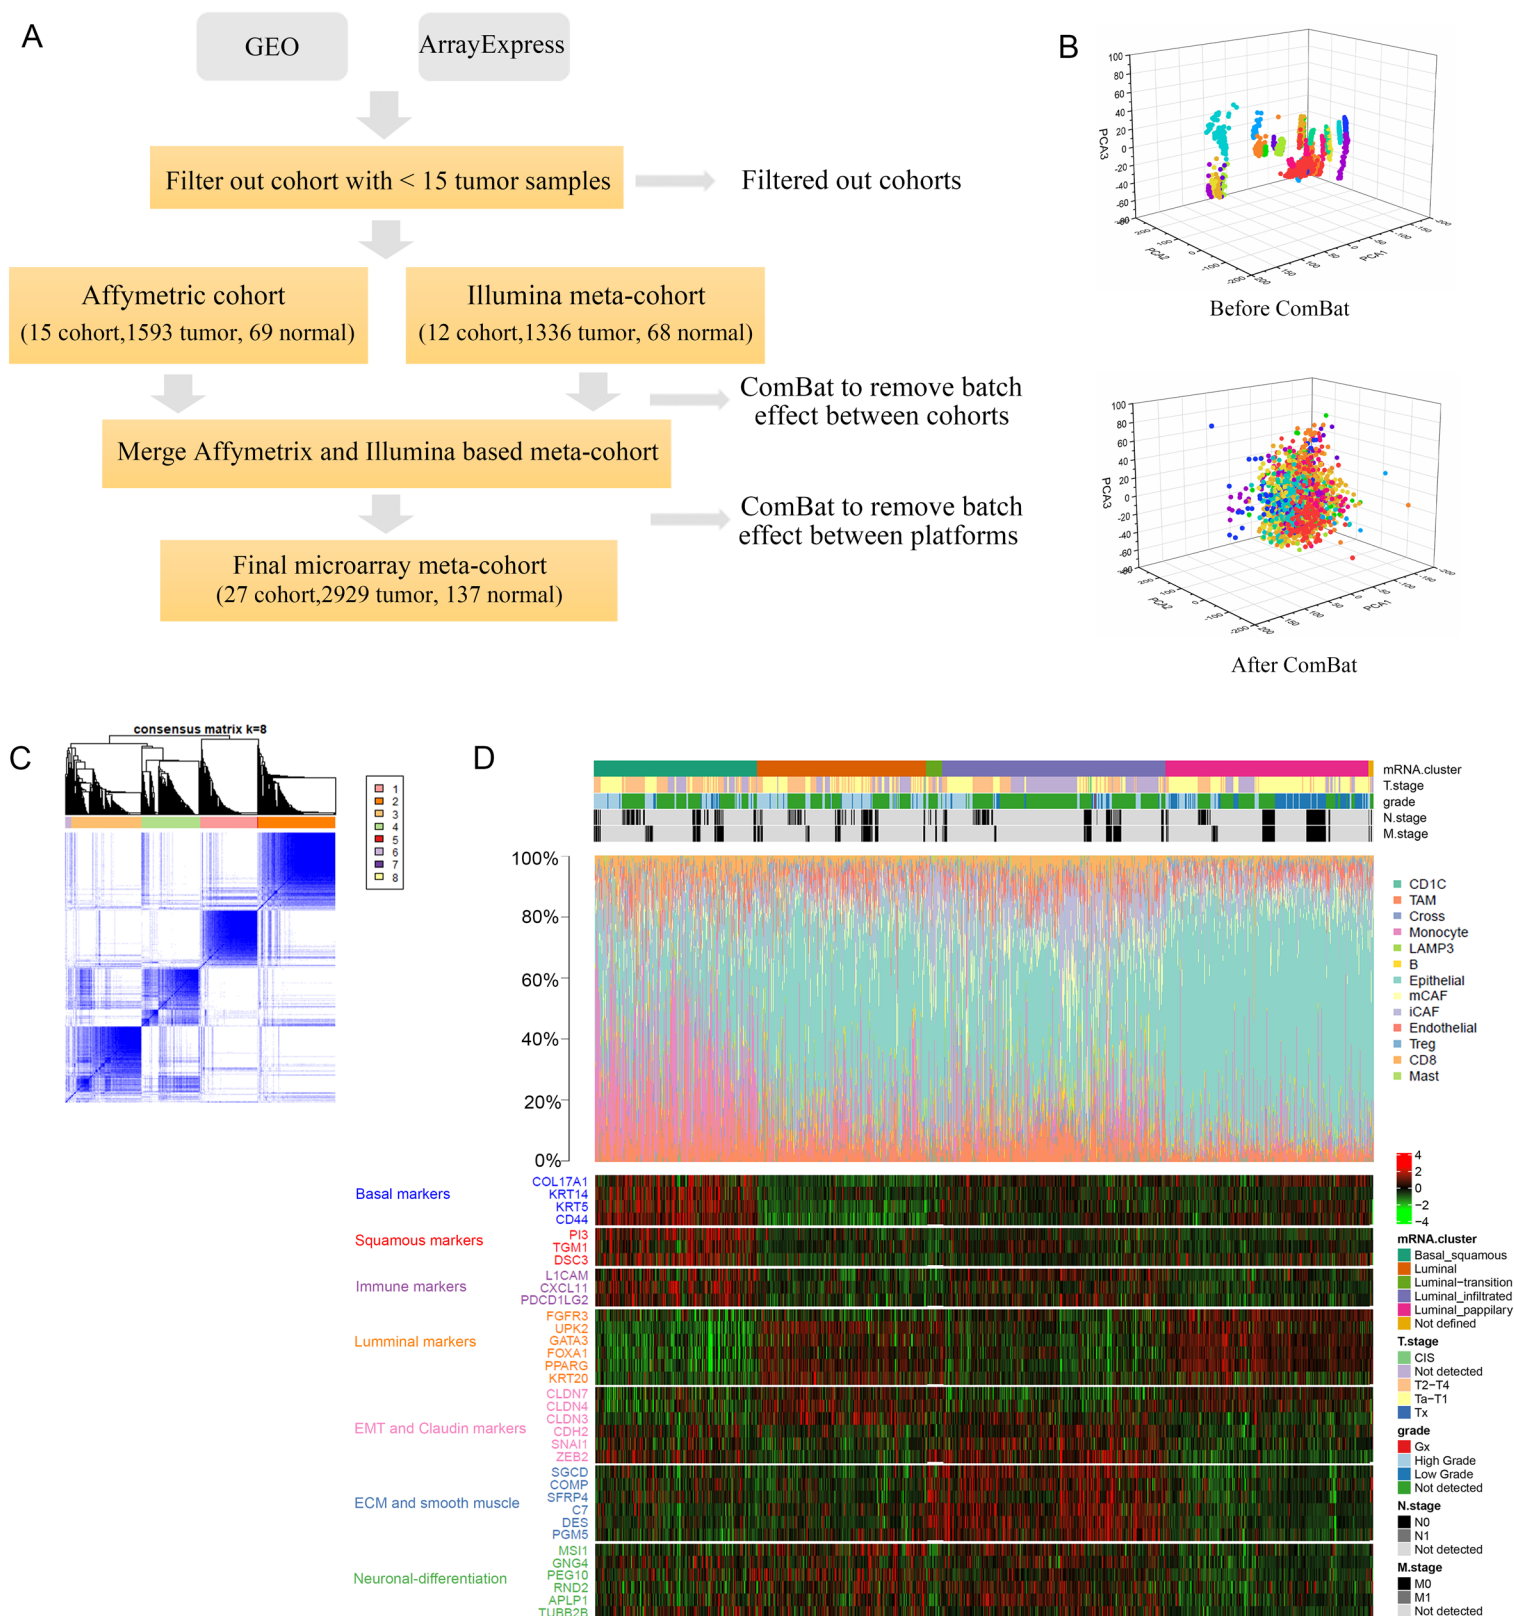

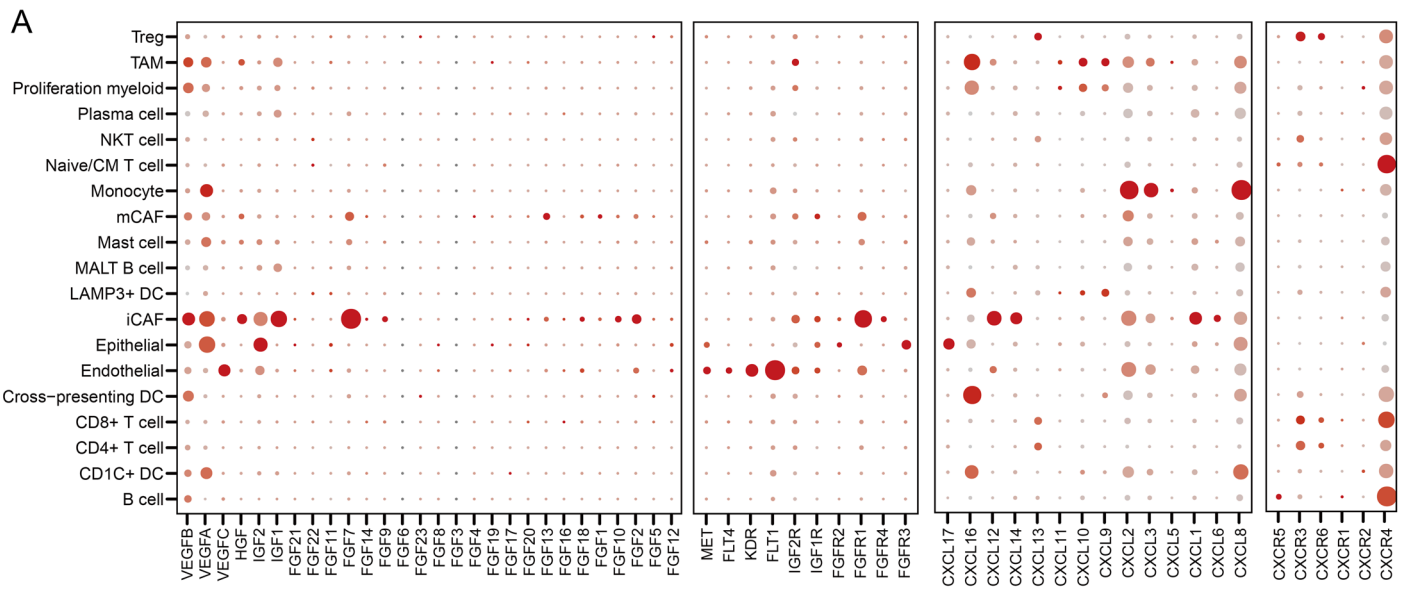

**Supplementary Figure 9:** Expression of growth factors, chemokines and their receptors across cell subgroups.

**Supplementary Table 1: Clinical information of bladder carcinoma and non-malignant tissues**

| SampleID | PatientID | Cell Num before QC | Cell Num after QC | gender | age   | Grade | Invasiveness | Type of surgery | Tumor size | Therapy                            |
|----------|-----------|--------------------|-------------------|--------|-------|-------|--------------|-----------------|------------|------------------------------------|
| L-T1     | 1         | 3267               | 3006              | M      | 67 ys | low   | Noninvasive  | TURBT           | 1.9 cm     | Primary tumor without pretreatment |
| L-T2     | 2         | 10049              | 9320              | M      | 70 ys | low   | Noninvasive  | TURBT           | 2.5 cm     | primary tumor with no pretreatment |
| H-T1     | 3         | 3584               | 3463              | M      | 63 ys | high  | Noninvasive  | Cystectomy      | 3.5 cm     | primary tumor with no pretreatment |
| H-T2     | 4         | 8342               | 8226              | F      | 59 ys | high  | Noninvasive  | Cystectomy      | 4.7 cm     | primary tumor with no pretreatment |
| H-I-T1   | 5         | 4467               | 4218              | M      | 57 ys | high  | Invasive     | Cystectomy      | 5.1 cm     | primary tumor with no pretreatment |
| H-I-T2   | 6         | 3180               | 1818              | M      | 75 ys | high  | Invasive     | Cystectomy      | 4.3 cm     | primary tumor with no pretreatment |
| H-I-T3   | 7         | 4270               | 3854              | M      | 77 ys | high  | Invasive     | Cystectomy      | 4.5 cm     | primary tumor with no pretreatment |
| H-I-T4   | 8         | 8123               | 7565              | F      | 72 ys | high  | Invasive     | Cystectomy      | 4.1 cm     | primary tumor with no pretreatment |
| N1       | 1         | 3459               | 3356              | M      | 67 ys | -     | -            | TURBT           | -          | -                                  |
| N2       | 6         | 3334               | 2761              | M      | 75 ys | -     | -            | Cystectomy      | -          | -                                  |
| N3       | 3         | 5310               | 5134              | M      | 63 ys | -     | -            | Cystectomy      | -          | -                                  |

**Supplementary Table 2: Top Cell type Specific Motifs of Myeloid Lineage**

| Celltype            | TOP specific TF |
|---------------------|-----------------|
| TAM                 | MAF(+)          |
| TAM                 | MITF(+)         |
| TAM                 | NR1H3(+)        |
| TAM                 | STAT1(+)        |
| TAM                 | USF2(+)         |
| TAM                 | STAT2(+)        |
| TAM                 | CEBPA(+)        |
| TAM                 | ETV5(+)         |
| TAM                 | TFEC(+)         |
| TAM                 | MAFB(+)         |
| TAM                 | CREB3L2(+)      |
| TAM                 | ARNT(+)         |
| CD1C+ DC            | RUNX3(+)        |
| CD1C+ DC            | SPIB(+)         |
| CD1C+ DC            | HIC1(+)         |
| CD1C+ DC            | IRF4(+)         |
| Cross-presenting DC | IRF8(+)         |
| Cross-presenting DC | AR(+)           |
| Cross-presenting DC | ZNF189(+)       |
| Monocyte            | NFE2(+)         |
| Monocyte            | BACH1(+)        |
| Monocyte            | CREB5(+)        |
| Monocyte            | MAFG(+)         |
| Monocyte            | STAT4(+)        |
| Monocyte            | NFKB2(+)        |
| LAMP3+ DC           | RELB(+)         |
| LAMP3+ DC           | KDM2B(+)        |
| LAMP3+ DC           | FOXP4(+)        |
| LAMP3+ DC           | ETV3L(+)        |
| LAMP3+ DC           | ZNF597(+)       |
| LAMP3+ DC           | CDX2(+)         |
| LAMP3+ DC           | HIVEP1(+)       |
| LAMP3+ DC           | NFE2L1(+)       |
